# Supplementary material for: Aviculin Isolated from Lespedeza cuneata Induce Apoptosis in Breast Cancer Cells through Mitochondria-Mediated Caspase Activation Pathway
Source: PubMed Central journal article supplement (PMC7180549; doi:10.3390/molecules25071708), 2020-04-08
Supplement: molecules-25-01708-s001.pdf [file molecules-25-01708-s001.pdf]

## Supplementary Materials

---

# Aviculin Isolated from *Lespedeza cuneata* Induce Apoptosis in Breast Cancer Cells through Mitochondria-Mediated Caspase Activation Pathway

Dahae Lee <sup>1,†</sup>, Yong Hoon Lee <sup>2,†</sup>, Kwang Ho Lee <sup>2,†</sup>, Bum Soo Lee <sup>2</sup>, Akida Alishir <sup>2</sup>, Yoon-Joo Ko <sup>3</sup>, Ki Sung Kang <sup>1,\*</sup> and Ki Hyun Kim <sup>2,\*</sup>

<sup>1</sup> College of Korean Medicine, Gachon University, Seongnam 13120, Korea; pjsldh@naver.com

<sup>2</sup> School of Pharmacy, Sungkyunkwan University, Suwon 16419, Korea; yhl2090@naver.com (Y.H.L.); sholaly@naver.com (K.H.L.); kosboybs@naver.com (B.S.L.); akida.alishir@gmail.com (A.A.)

<sup>3</sup> Laboratory of Nuclear Magnetic Resonance, National Center for Inter-University Research Facilities (NCIRF), Seoul National University, Gwanak-gu, Seoul 08826, Korea; yjko@snu.ac.kr

\* Correspondence: kkang@gachon.ac.kr (K.S.K.); khkim83@skku.edu (K.H.K.); Tel.: +82-31-750-5402 (K.S.K.); +82-31-290-7700 (K.H.K.)

† These authors contributed equally to this work

Figure S1.  $^1\text{H}$ -NMR data of compound 1.

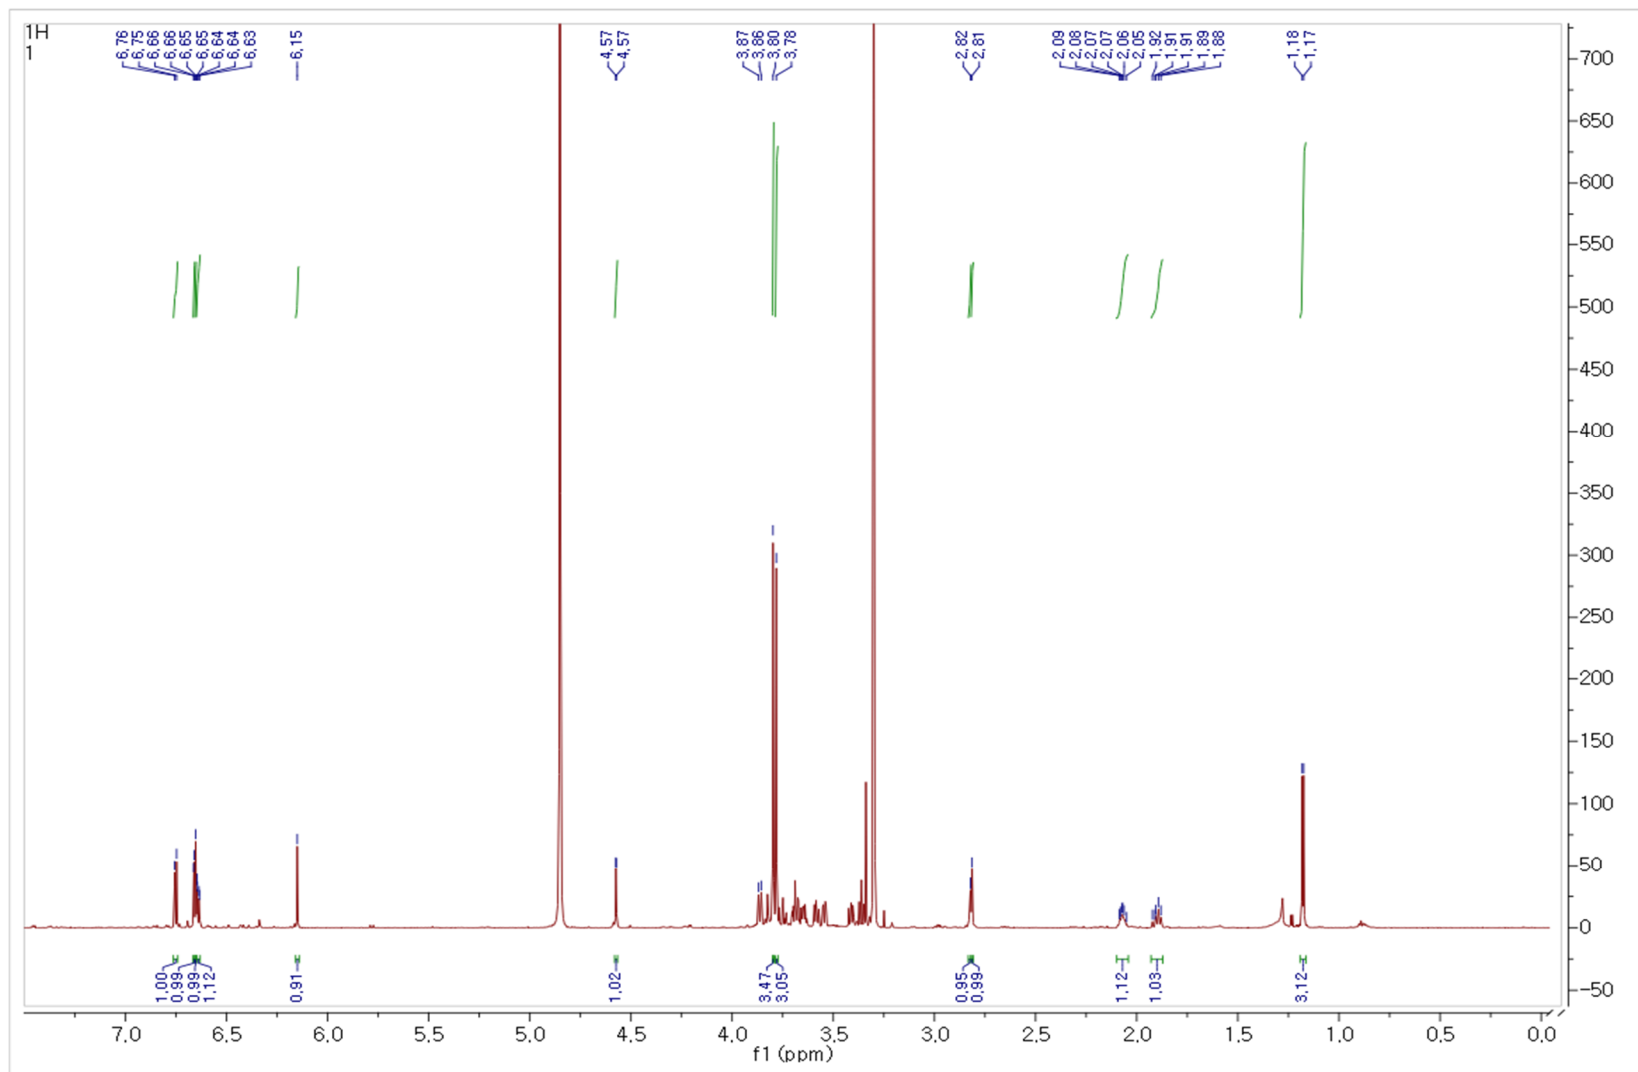

Figure S2.  $^1\text{H}$ -NMR data of compound 2.

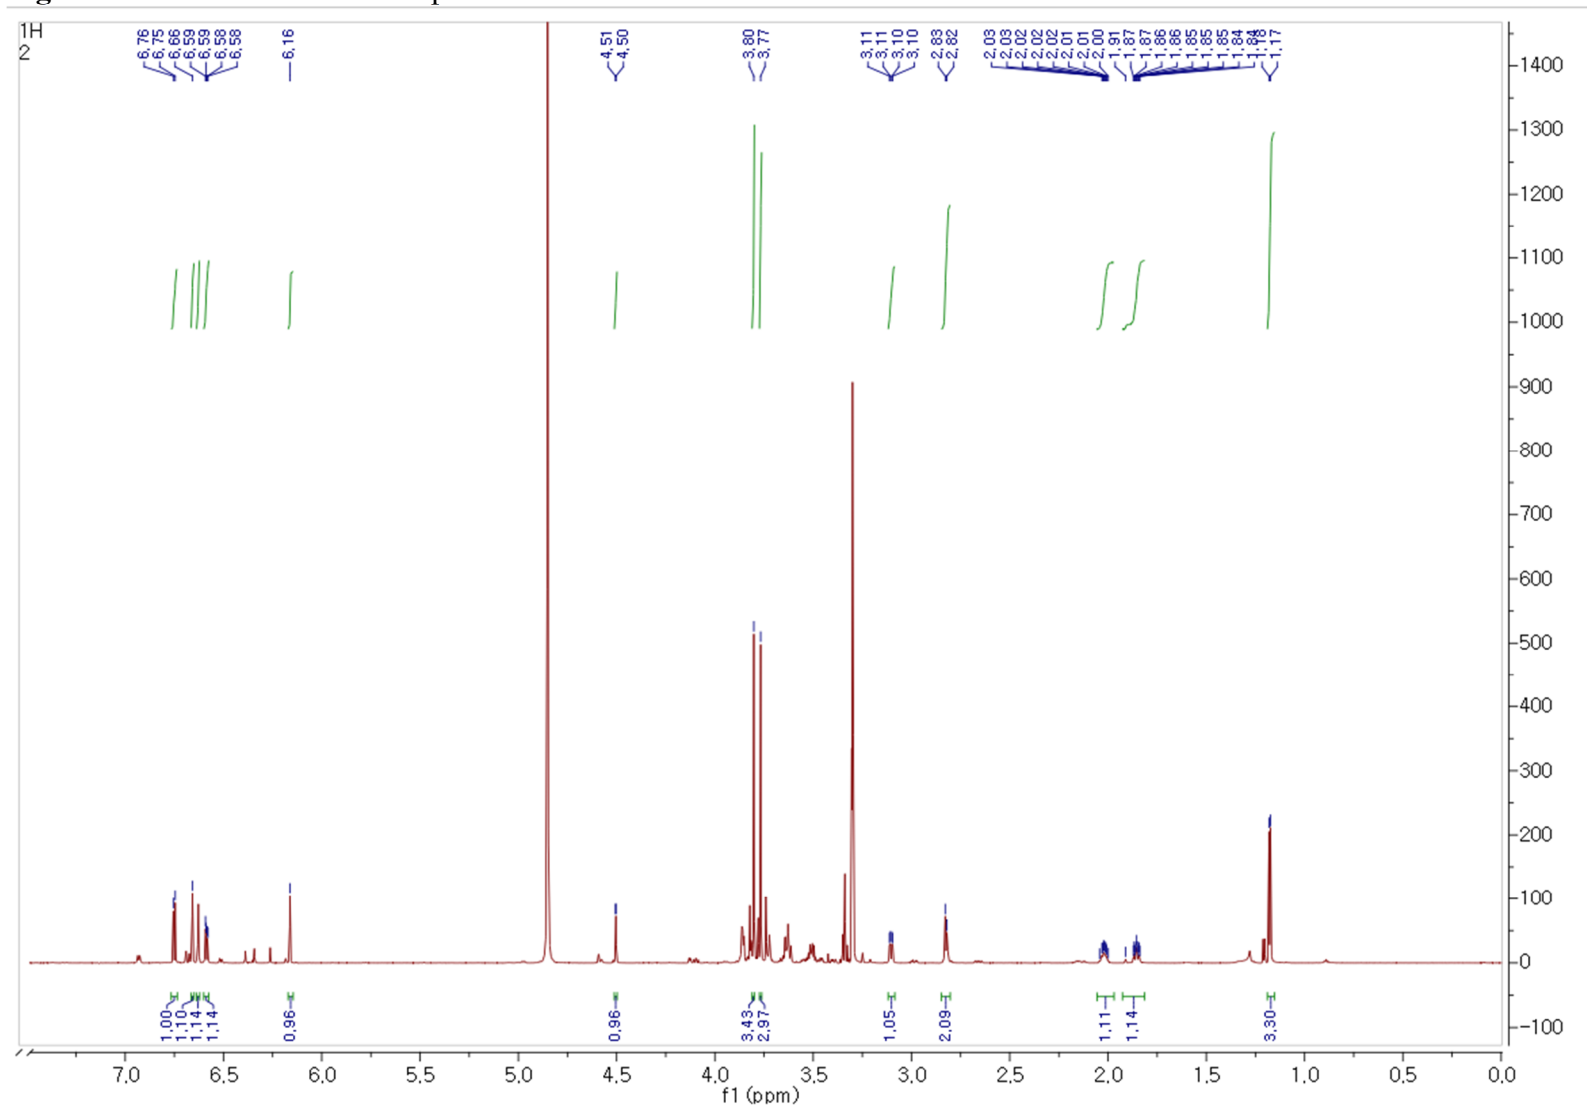

Figure S3. <sup>1</sup>H-NMR data of compound 3.

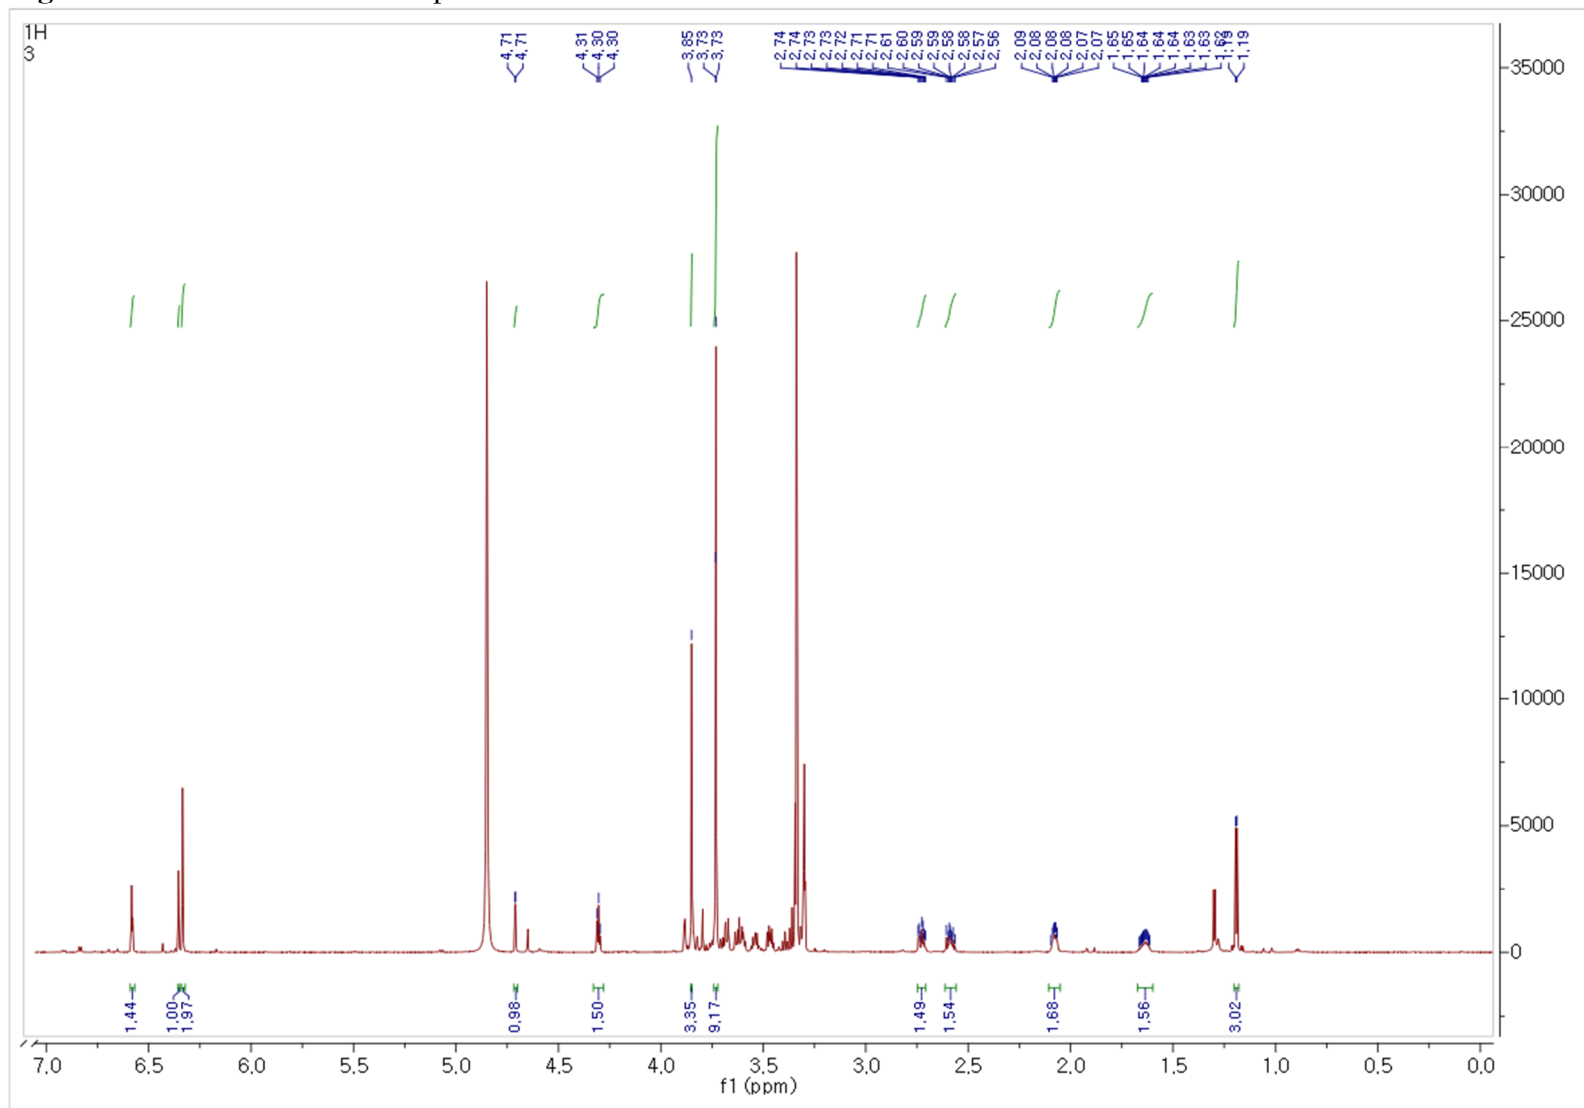

Figure S4.  $^1\text{H-NMR}$  data of compound 4.

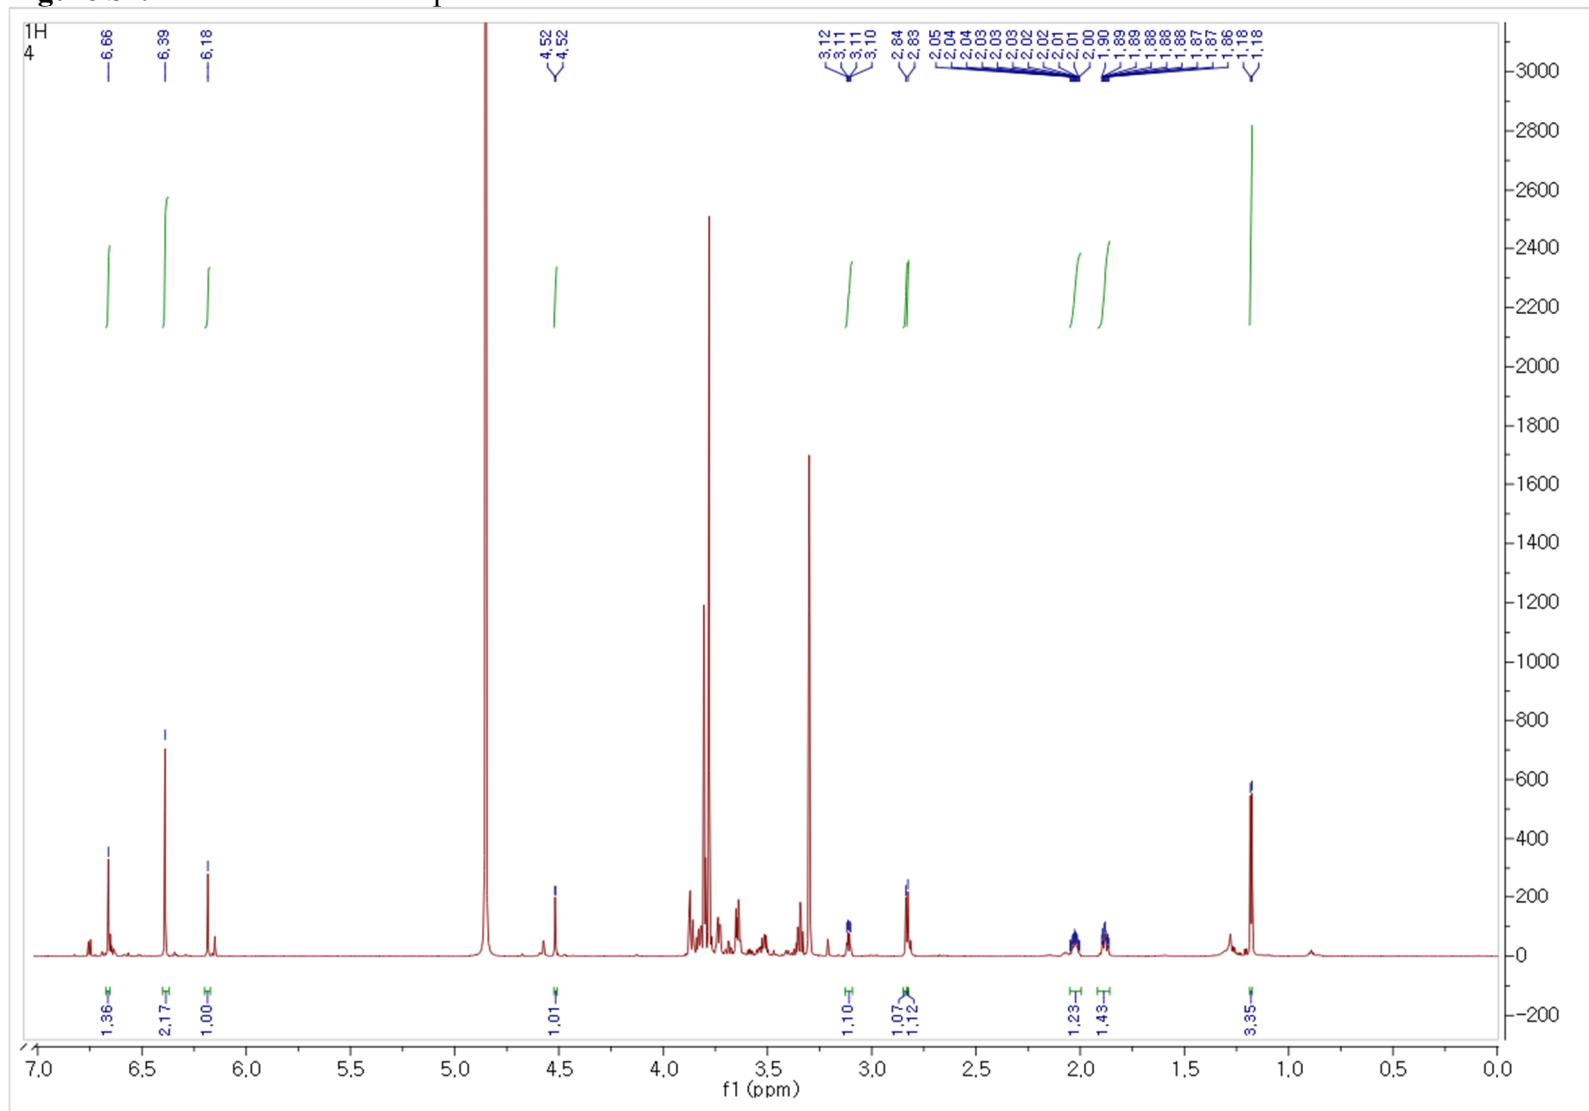

Figure S5. <sup>1</sup>H-NMR data of compound 5.

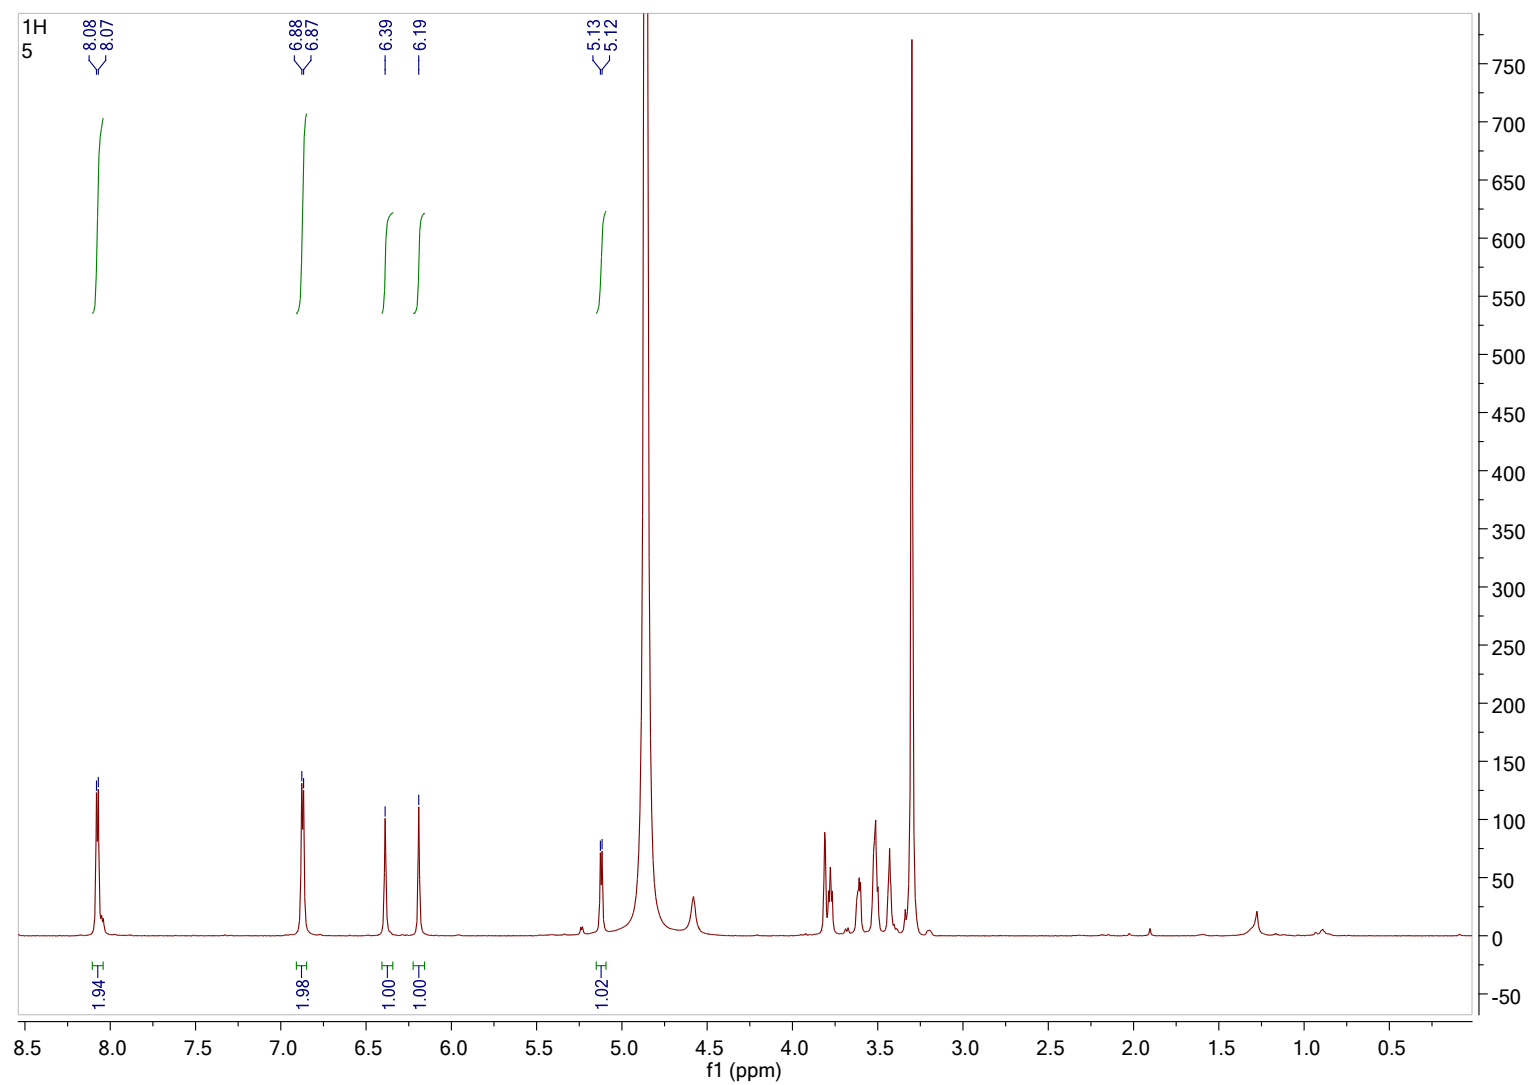

Figure S6.  $^1\text{H}$ -NMR data of compound 6.

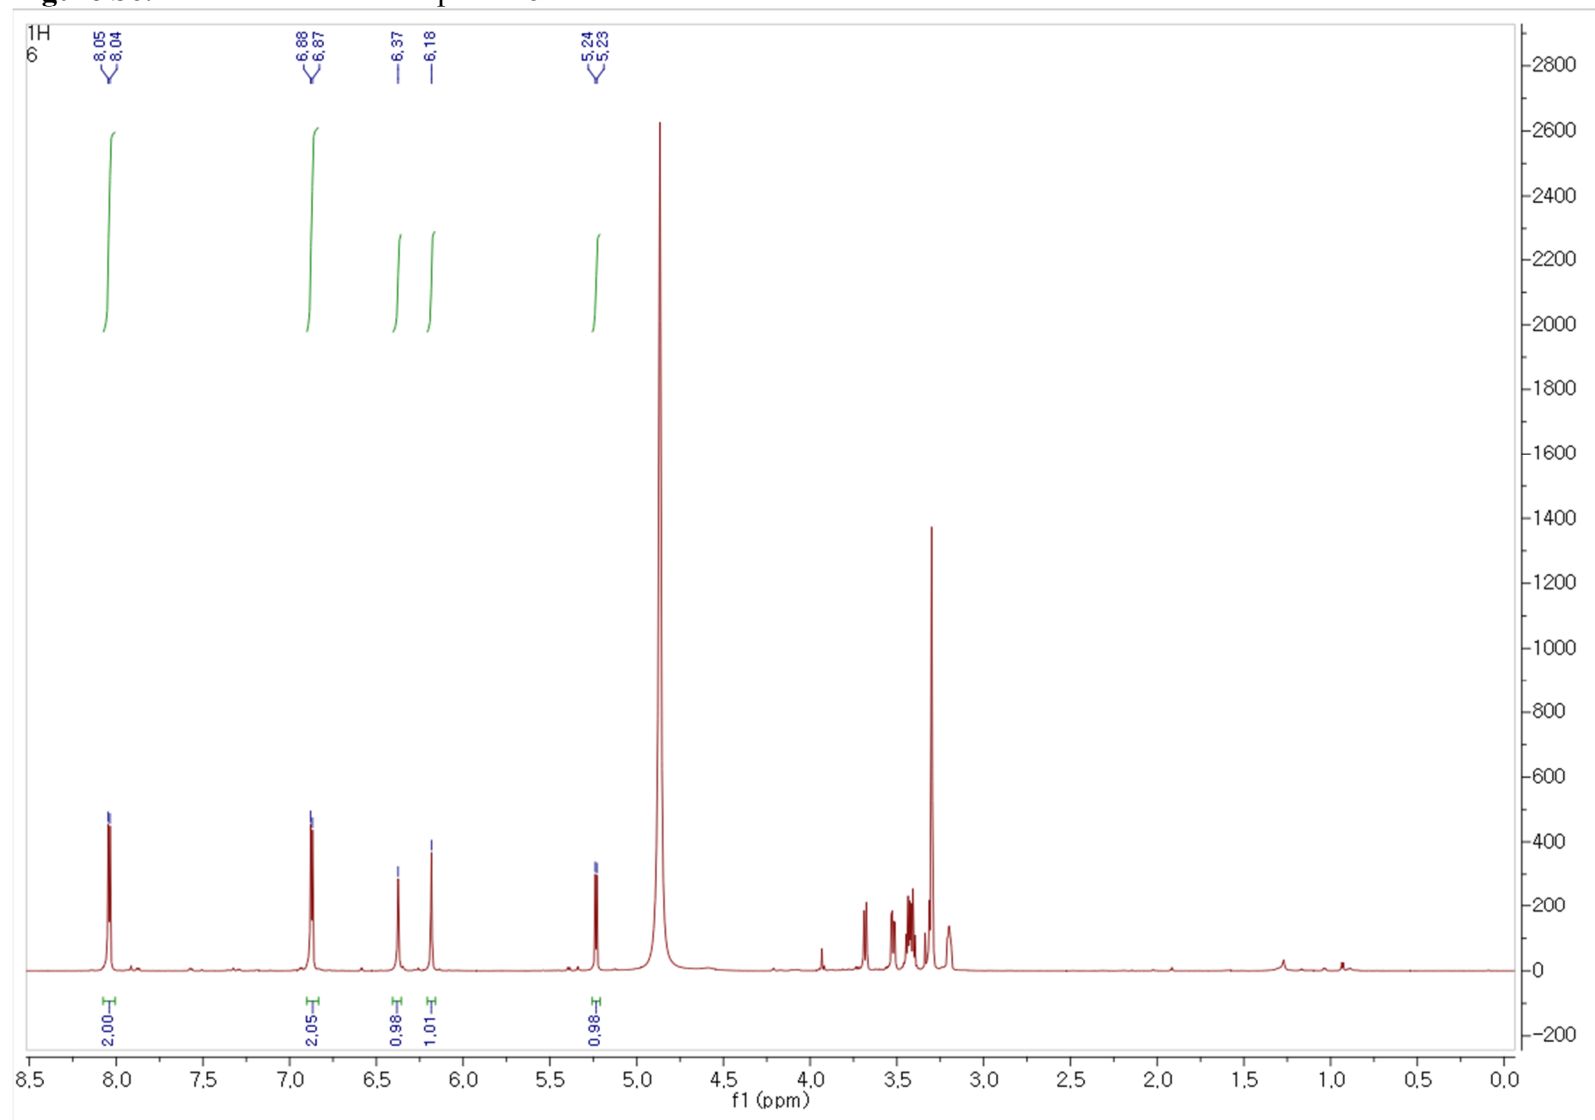

Figure S7. <sup>1</sup>H-NMR data of compound 7.

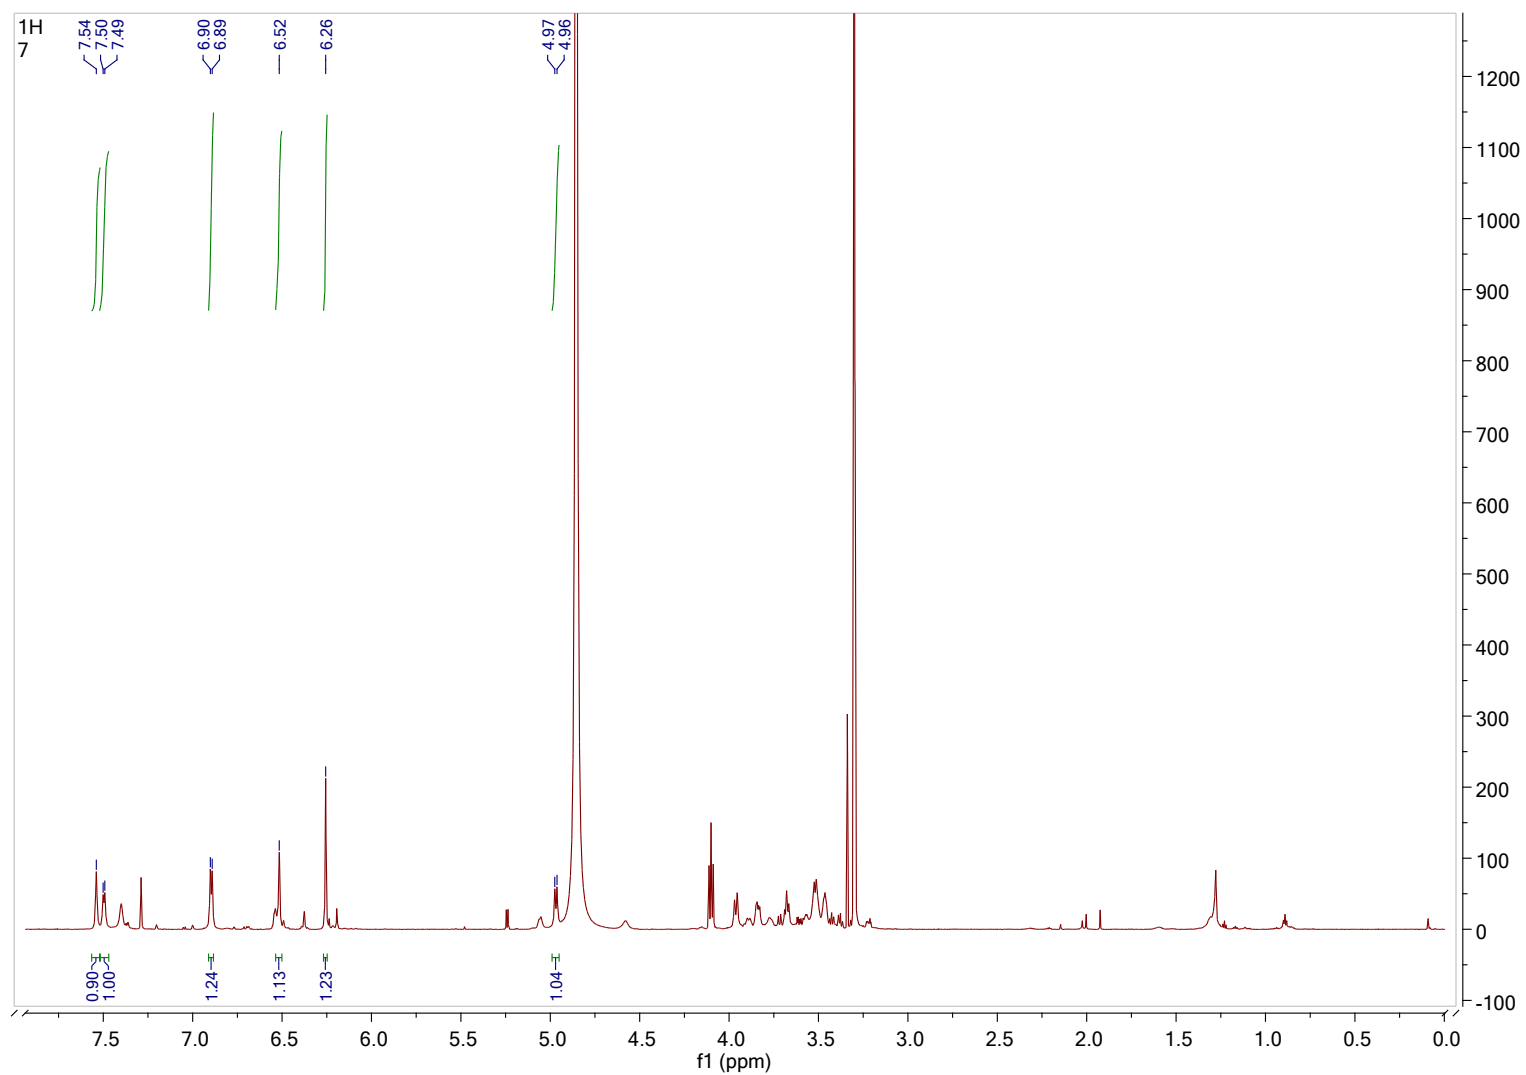



**Figure S8.**  $^1\text{H}$ -NMR data of compound **8**.

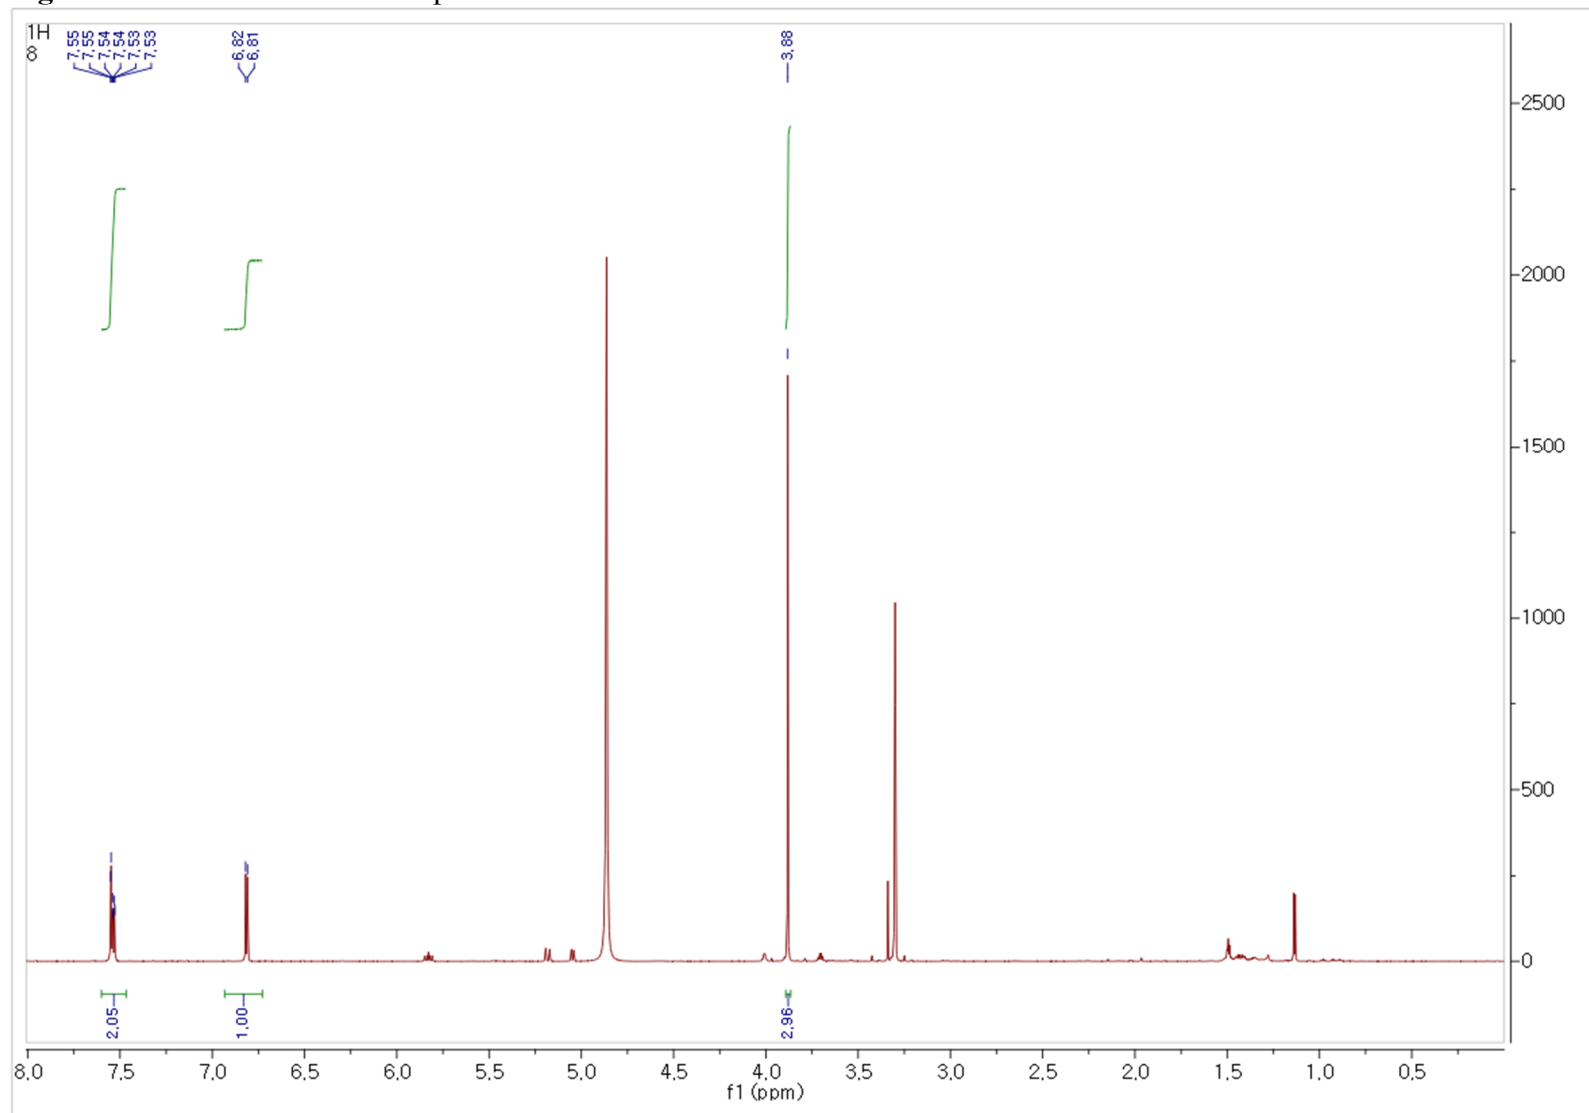



**Figure S10.** LC/MS analysis for purity of compounds 1-9.

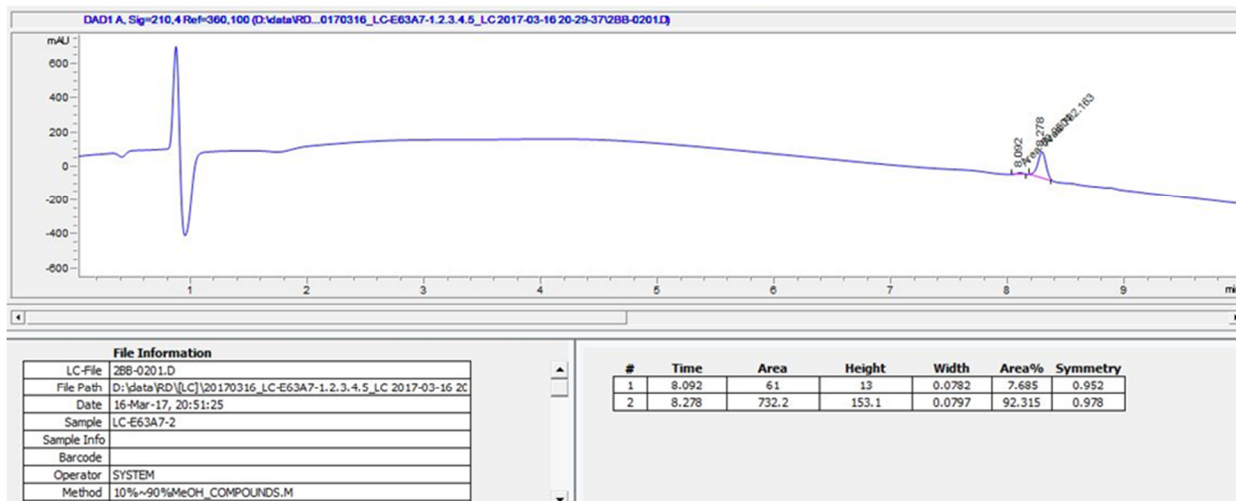

Conditions for LC-MS/MS analysis

- Agilent Technologies 1200s
- Column: Phenomenex Kinetex 5 μm C18 100A 100 x 2.1 mm
- Flow: 0.3 mL/min
- Detector: PDA detector (210 nm)
- Mobile phase: Water-MeOH gradient

| Time | MeOH |
|------|------|
| 0.0  | 10   |
| 10   | 90   |

Purity : 92.315%

**Compound 1**

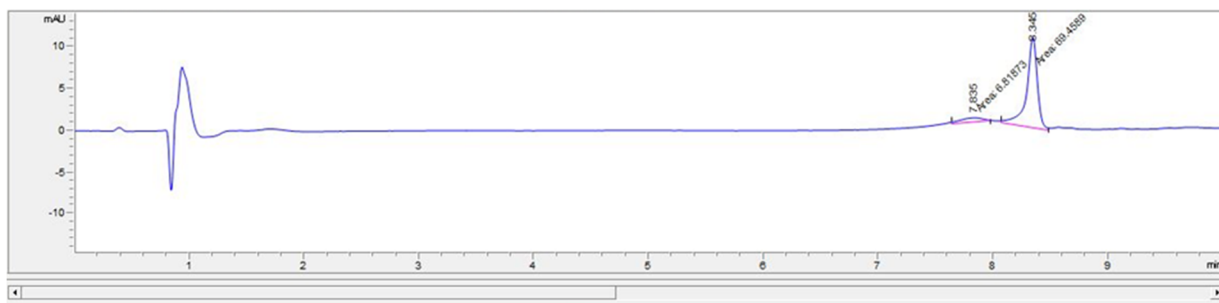

| File Information |                                                            |
|------------------|------------------------------------------------------------|
| LC-File          | ZDD-0301.D                                                 |
| File Path        | D:\data\RD\LC\20170306_LC-E63725-1.2.3_LC 2017-03-06 17-06 |
| Date             | 06-Mar-17, 17:48:55                                        |
| Sample           | LC-E63725-3                                                |
| Sample Info      |                                                            |
| Barcode          |                                                            |
| Operator         | SYSTEM                                                     |
| Method           | 10%~90%MeOH_COMPOUNDS.M                                    |

  

| # | Time  | Area | Height | Width  | Area%  | Symmetry |
|---|-------|------|--------|--------|--------|----------|
| 1 | 7.835 | 6.8  | SE-1   | 0.2281 | 8.939  | 1.882    |
| 2 | 8.345 | 69.5 | 10.8   | 0.1072 | 91.061 | 1.342    |

Purity : 91.061%

- Conditions for LC-MS/MS analysis
- Agilent Technologies 1200s
  - Column: Phenomenex Kinetex 5  $\mu$ m C18 100A 100 x 2.1 mm
  - Flow: 0.3 mL/min
  - Detector: PDA detector (315 nm)
  - Mobile phase: Water-MeOH gradient

| Time | MeOH |
|------|------|
| 0.0  | 10   |
| 10   | 90   |

**Compound 2**

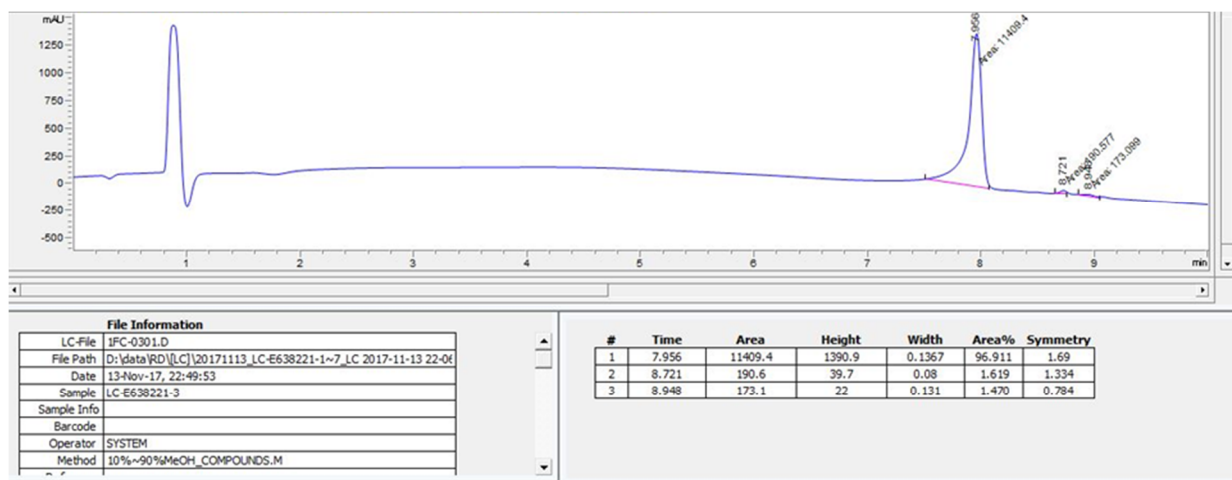

Conditions for LC-MS/MS analysis

- Agilent Technologies 1200s
- Column: Phenomenex Kinetex 5  $\mu$ m C18 100A 100 x 2.1 mm
- Flow: 0.3 mL/min
- Detector: PDA detector (210 nm)
- Mobile phase: Water-MeOH gradient

| Time | MeOH |
|------|------|
| 0.0  | 10   |
| 10   | 90   |

Purity : 96.911%

Compound 3

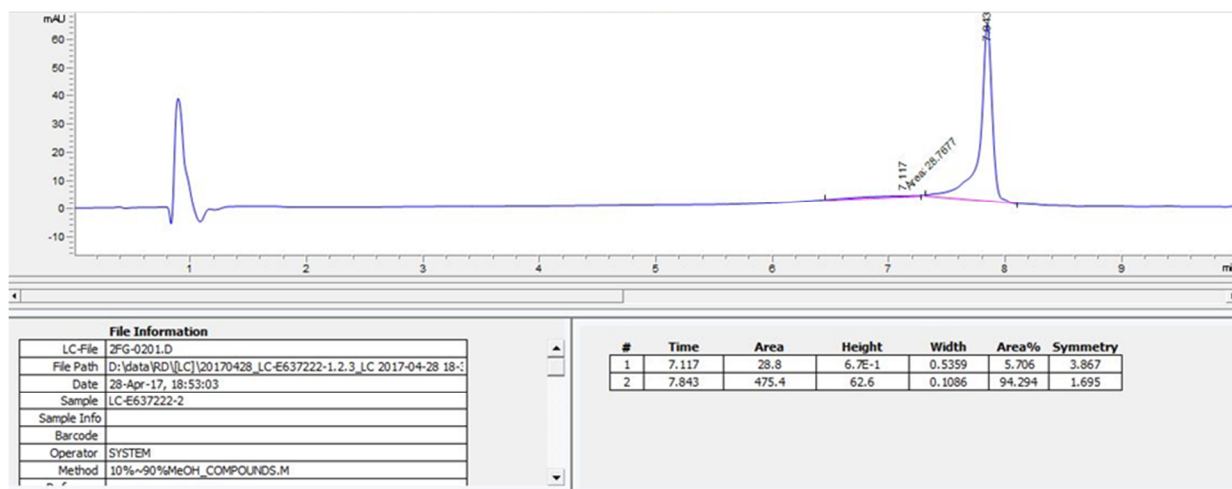

Purity : 94.294%

- Conditions for LC-MS/MS analysis
- Agilent Technologies 1200s
  - Column: Phenomenex Kinetex 5  $\mu$ m C18 100A 100 x 2.1 mm
  - Flow: 0.3 mL/min
  - Detector: PDA detector (254 nm)
  - Mobile phase: Water-MeOH gradient

| Time | MeOH |
|------|------|
| 0.0  | 10   |
| 10   | 90   |

**Compound 4**

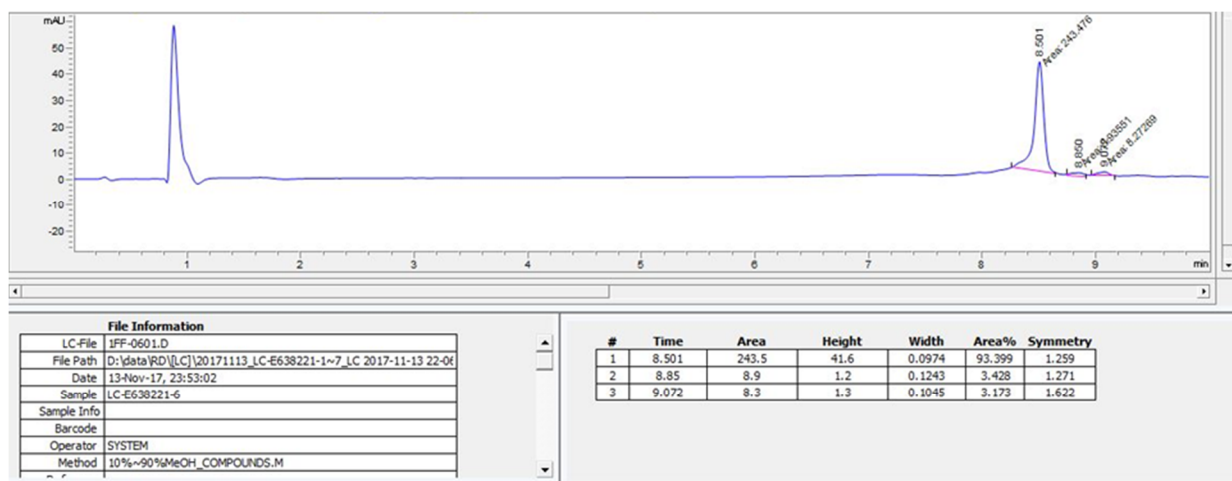

Conditions for LC-MS/MS analysis

- Agilent Technologies 1200s
- Column: Phenomenex Kinetex 5  $\mu$ m C18 100A 100 x 2.1 mm
- Flow: 0.3 mL/min
- Detector: PDA detector (254 nm)
- Mobile phase: Water-MeOH gradient

| Time | MeOH |
|------|------|
| 0.0  | 10   |
| 10   | 90   |

Purity : 93.399%

**Compound 5**

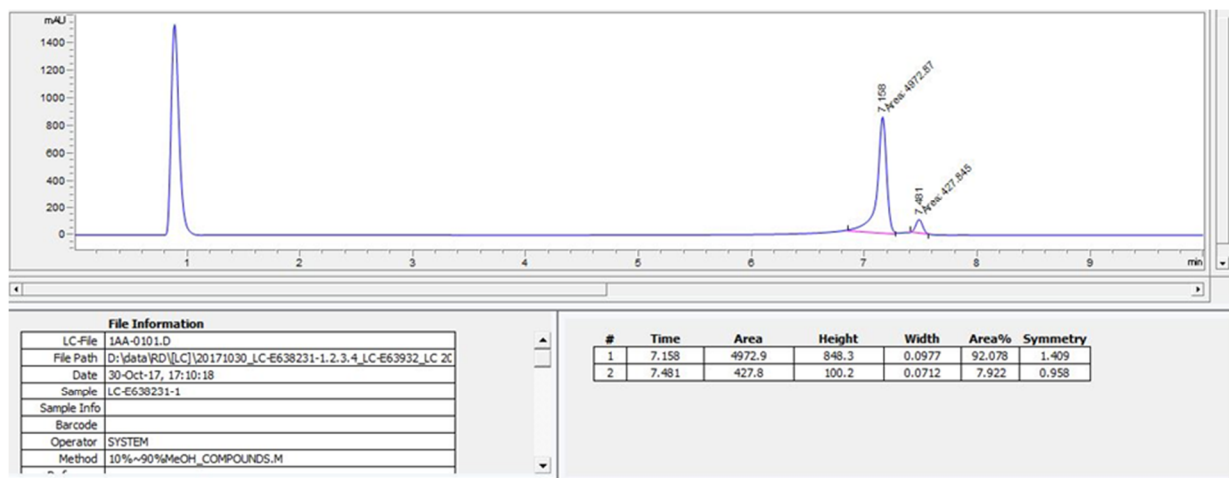

- Conditions for LC-MS/MS analysis
- Agilent Technologies 1200s
  - Column: Phenomenex Kinetex 5  $\mu$ m C18 100A 100 x 2.1 mm
  - Flow: 0.3 mL/min
  - Detector: PDA detector (254 nm)
  - Mobile phase: Water-MeOH gradient

| Time | MeOH |
|------|------|
| 0.0  | 10   |
| 10   | 90   |

Purity : 92.078%

**Compound 6**



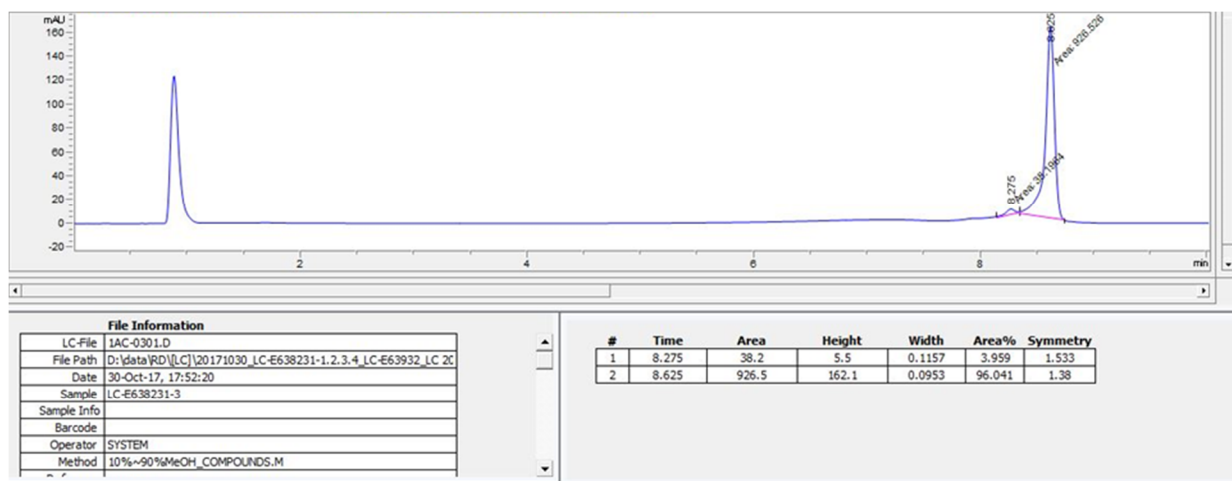

Conditions for LC-MS/MS analysis

- Agilent Technologies 1200s
- Column: Phenomenex Kinetex 5  $\mu$ m C18 100A 100 x 2.1 mm
- Flow: 0.3 mL/min
- Detector: PDA detector (315 nm)
- Mobile phase: Water-MeOH gradient

| Time | MeOH |
|------|------|
| 0.0  | 10   |
| 10   | 90   |

**Purity : 96.041%**

**Compound 7**

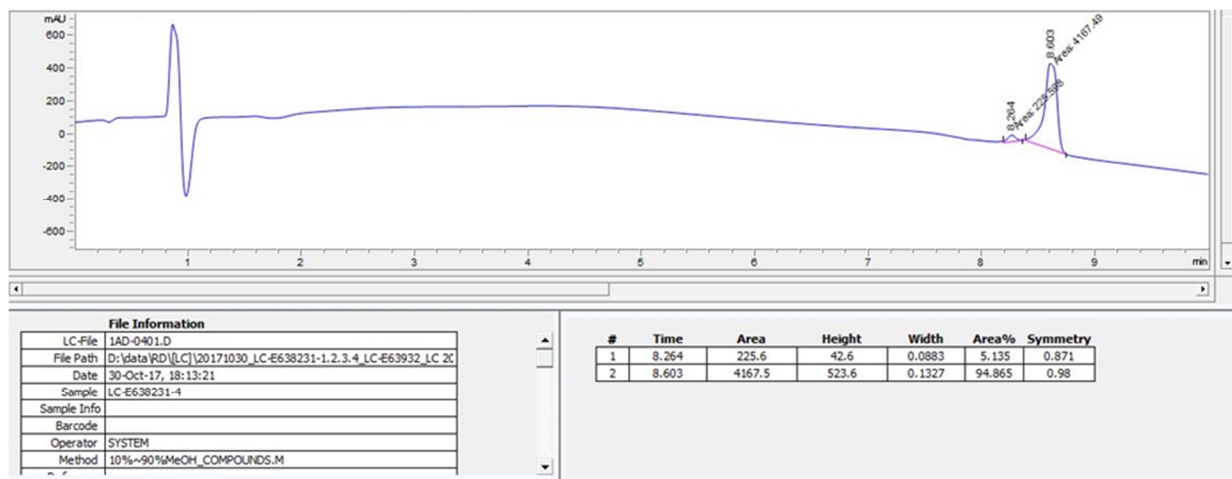

- Conditions for LC-MS/MS analysis
- Agilent Technologies 1200s
  - Column: Phenomenex Kinetex 5  $\mu$ m C18 100A 100 x 2.1 mm
  - Flow: 0.3 mL/min
  - Detector: PDA detector (210 nm)
  - Mobile phase: Water-MeOH gradient

| Time | MeOH |
|------|------|
| 0.0  | 10   |
| 10   | 90   |

Purity : 94.865%

Compound 8

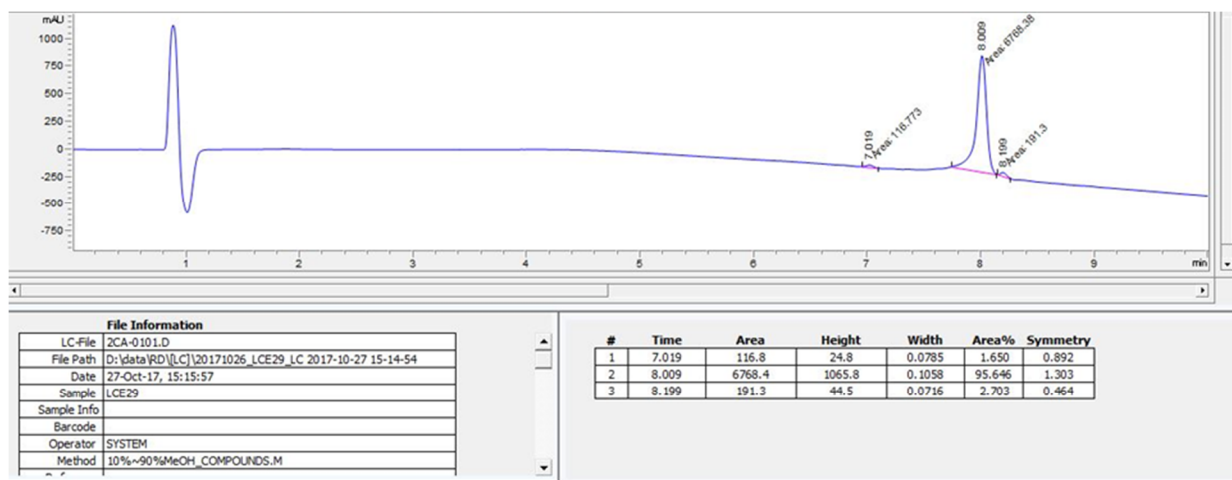

Conditions for LC-MS/MS analysis

- Agilent Technologies 1200s
- Column: Phenomenex Kinetex 5  $\mu$ m C18 100A 100 x 2.1 mm
- Flow: 0.3 mL/min
- Detector: PDA detector (210 nm)
- Mobile phase: Water-MeOH gradient

| Time | MeOH |
|------|------|
| 0.0  | 10   |
| 10   | 90   |

Purity : 95.646%

**Compound 9**
